# Supplementary material for: Marine CO 2 system variability along the northeast Pacific Inside Passage determined from an Alaskan ferry
Source: Copernicus journal article supplement (doi:10.5194/bg-19-1277-2022), 2022-03-03
Supplement: Supplementary file 1 [file bg-19-1277-2022-supplement.pdf]

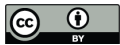

*Supplement of*

## **Marine CO<sub>2</sub> system variability along the northeast Pacific Inside Passage determined from an Alaskan ferry**

**Wiley Evans et al.**

*Correspondence to:* Wiley Evans ([wiley.evans@hakai.org](mailto:wiley.evans@hakai.org))

The copyright of individual parts of the supplement might differ from the article licence.

### Supplemental Text S1: M/V *Columbia* schedule

The vessel left Bellingham, WA (Figure 1) on Friday evening and arrived in Ketchikan, AK by Sunday morning. From there, the ship travelled north to Wrangell, Petersburg, Juneau, Haines, and Skagway. After leaving Skagway, the M/V *Columbia* travelled south to Sitka, then back to Ketchikan by Wednesday afternoon, and finally returned to Bellingham, WA by Friday morning.

35

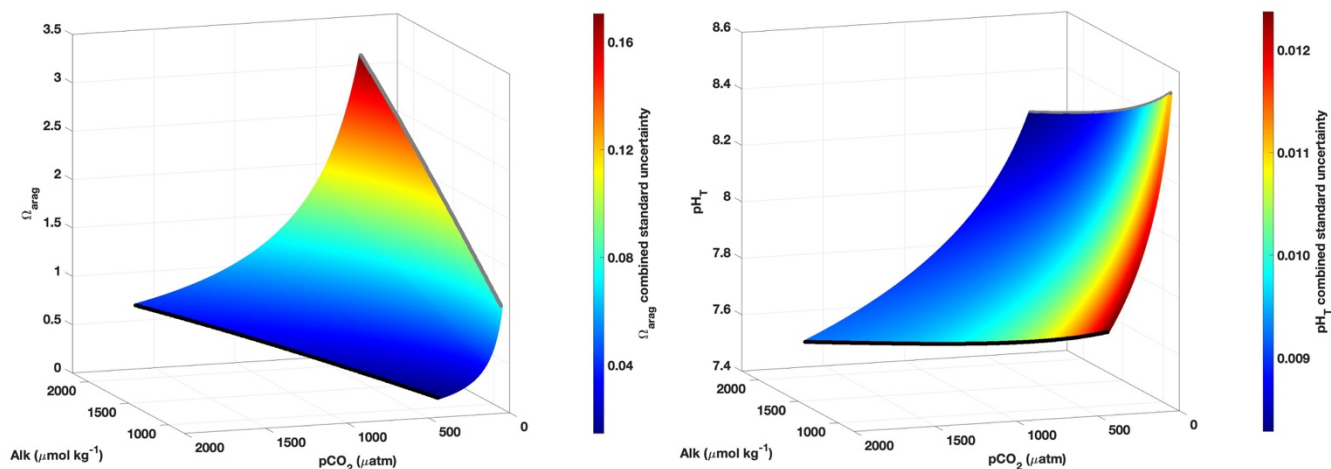

**Supplemental Figure S1:** Combined standard uncertainty in  $\Omega_{\text{arag}}$  (left) and  $\text{pH}_T$  (right) as a function of  $\text{pCO}_2$  ( $\mu\text{atm}$ ) and alkalinity (Alk;  $\mu\text{mol kg}^{-1}$ ).  $\text{pCO}_2$  is computed across a range of  $\text{TCO}_2$ :Alk ratios in each panel, with the grey line equalling a ratio of 0.85 and the black line being unity.

40

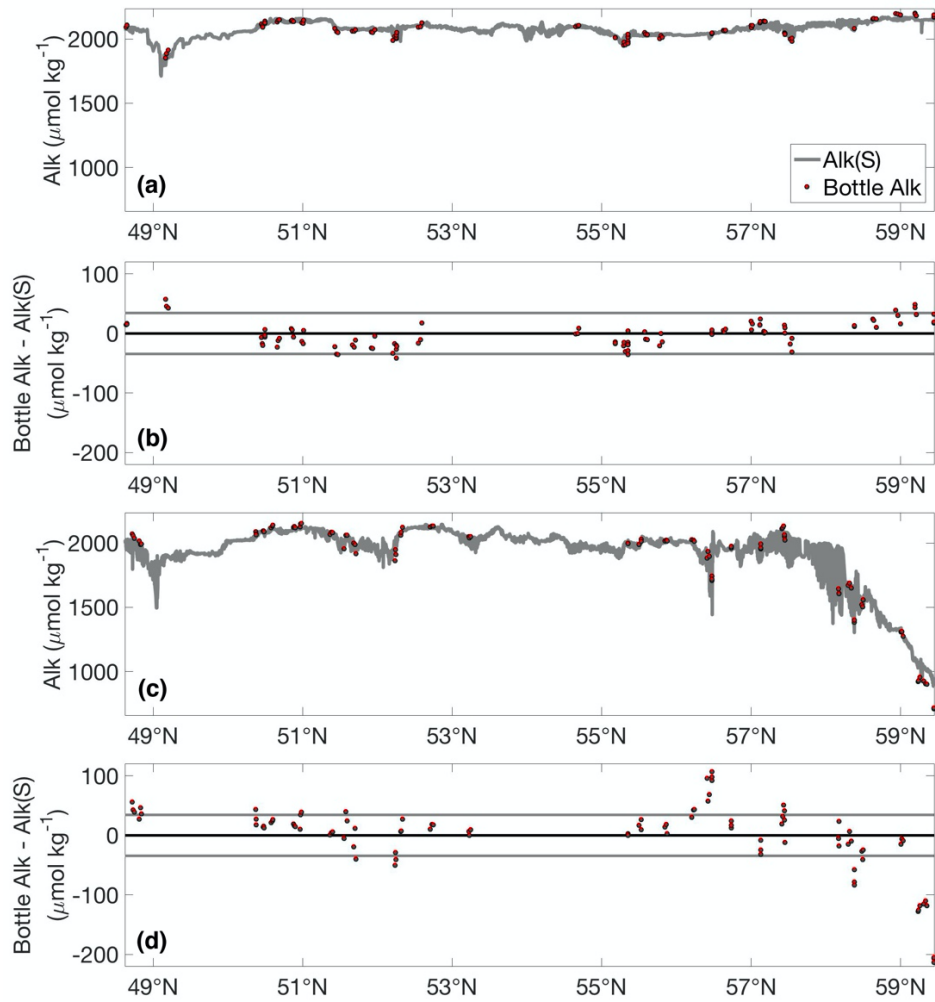

**Supplemental Figure S2:** Comparison between estimated and derived alkalinity (Alk) from two ferry ride-along cruises between November 11 to 17, 2017 and August 25 to 31, 2018. Panel a shows Alk estimated using the Alk-salinity relationship from Evans et al. (2015) (grey line; Alk(S)) and Alk calculated from discrete pCO<sub>2</sub> and TCO<sub>2</sub> measurements (red circles; Bottle Alk) from the first cruise in November 2017. Panel b is Bottle Alk minus Alk(S), with the grey horizontal lines as two times the RMSE of the Evans et al. (2015) relationship (34 μmol kg<sup>-1</sup>). Panel c shows Alk(S) and Bottle Alk from the second ride-along cruise in August 2018, with Panel d is the difference in these parameters. Alk is over-estimated by ~200 μmol kg<sup>-1</sup> during the summer melt season in the region of lowest alkalinity along the northern portion of the transit.

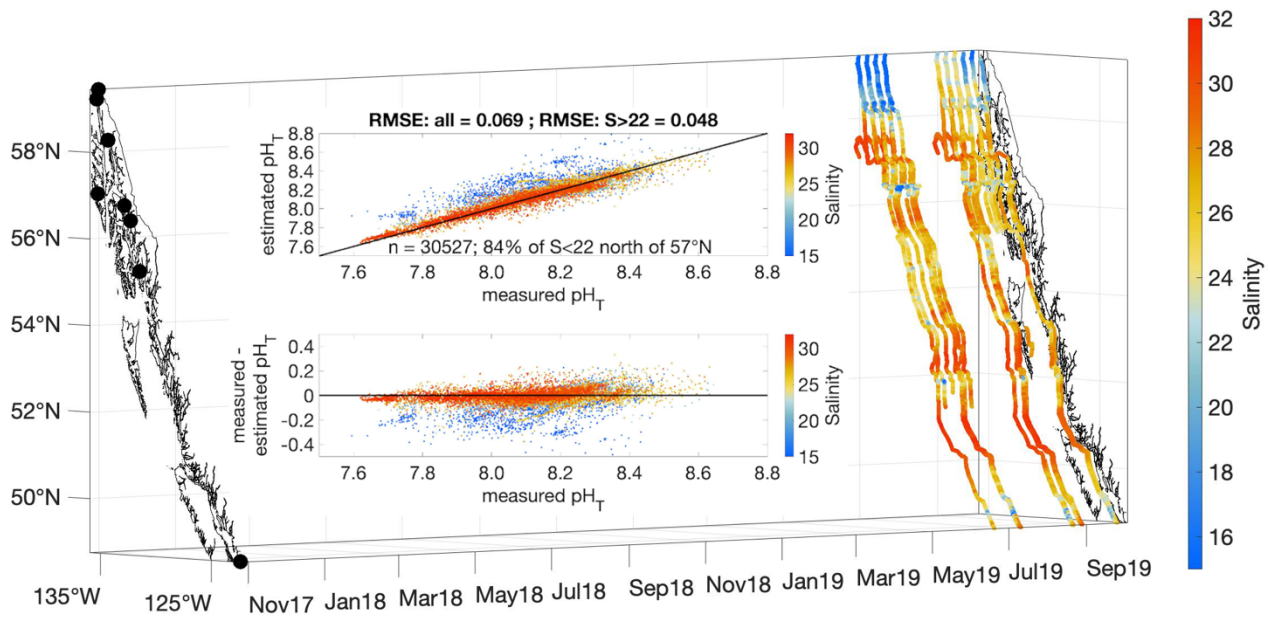

**Supplemental Figure S3:** Map shows the distribution of salinity measurements that correspond to BGC-SUMO  $pH_T$  data used to fill missing  $pCO_2$  observations. The insert shows the comparison between BGC-SUMO  $pH_T$  and  $pH_T$  estimated from  $pCO_2$  and the regional Alk-salinity relationship. Total number of comparison points was 30527 measurements. RMSE between measured and estimated  $pH_T$  was 0.069, and decreased to 0.048 for seawater measurements with  $S > 22$ . The largest offset between directly measured and estimated  $pH_T$  was in seawater with  $S < 22$ . 84% of  $S < 22$  seawater was observed north of 57°N during summer months in the region around Juneau and in Lynn Canal. In this region, the estimated Alk was too high, which resulted in  $pH_T$  and  $\Omega_{arag}$  being over-estimated and  $pCO_2$  being under-estimated for instances where  $pH_T$  was used to fill missing observations in low S water. However, the region still maintained  $\Omega_{arag} < 1$ , so accounting for this over-estimation would lead to more corrosive conditions. X- and y-axes represent longitude and latitude, respectively, and with the coastline and terminal positions shown as in Figure 1 and time increasing along the z-axis.

## Supplemental Text S2: Assessment of Seasonal Drivers

65 The basis for assessing seasonal drivers stems from the following thermodynamic relationship from Takahashi et al. (1993):

$$\Delta p\text{CO}_2 = \left(\frac{\partial p\text{CO}_2}{\partial T}\right) \Delta T + \left(\frac{\partial p\text{CO}_2}{\partial \text{TCO}_2}\right) \Delta \text{TCO}_2 + \left(\frac{\partial p\text{CO}_2}{\partial \text{TALK}}\right) \Delta \text{TALK} + \left(\frac{\partial p\text{CO}_2}{\partial S}\right) \Delta S \quad (\text{Equation 1})$$

that defines the change in  $p\text{CO}_2$  in seawater as a function of variation in temperature (T),  $\text{TCO}_2$ , total alkalinity (TALK, taken here to equal Alk when organic acid contributions are negligible), and salinity (S). Each partial differential term represents a “buffer factor”, with the two most commonly discussed in the literature being the Revelle factor (Sundquist et al., 1979; Eggleston et al., 2010; Middelburg et al., 2020),  $\left(\frac{\partial \ln p\text{CO}_2}{\partial \ln \text{TCO}_2}\right)$ , and the temperature sensitivity (Takahashi et al., 1993; Takahashi et al., 2002),  $\left(\frac{\partial \ln p\text{CO}_2}{\partial T}\right)$ . The global average Revelle factor is 10, meaning a 10% change in  $p\text{CO}_2$  would result from a 1% change in  $\text{TCO}_2$ ; whereas the temperature sensitivity of  $p\text{CO}_2$  is 0.0423, meaning  $p\text{CO}_2$  changes by roughly 4% per degree temperature change. Processes that drive variation in these four terms are seasonal warming and cooling, freshening and evaporation, physical transport and mixing, net community production (primary production minus community respiration), sea-air  $\text{CO}_2$  exchange, and calcification. The first two processes listed are thermodynamic drivers, and the remaining processes are biophysical drivers. In most open ocean applications, seasonal variation in  $p\text{CO}_2$  is dominated by variation in temperature and  $\text{TCO}_2$  (Takahashi et al., 2002). Removing the temperature component ( $p\text{CO}_2$  T-component) of the variability from the observations leaves behind variability driven by the remaining three terms in Equation 1.  $p\text{CO}_2$  variability with the  $p\text{CO}_2$  T-component removed is expressed as:

$$p\text{CO}_2 \text{ at } T_{\text{mean}} = p\text{CO}_{2,\text{obs}} \times e^{0.0423(T_{\text{mean}} - T_{\text{Obs}})} \quad (\text{Equation 2})$$

where  $T_{\text{mean}}$  is the mean temperature, and  $p\text{CO}_{2,\text{obs}}$  and  $T_{\text{obs}}$  are the  $p\text{CO}_2$  and temperature (T) observations within a grid cell. The  $p\text{CO}_2$  T-component of seawater  $p\text{CO}_2$  variability can be determined as the difference between the observations and  $p\text{CO}_2$  at  $T_{\text{mean}}$ . Here, the salinity component was computed using the relationship from Sarmiento and Gruber (2006) derived from Equation 1:

$$p\text{CO}_2 \text{ S - component} = \Delta S \times \left(\frac{\overline{p\text{CO}_2}}{\bar{S}}\right) \times (\gamma_S + \gamma_{\text{TCO}_2} + \gamma_{\text{TALK}}) \quad (\text{Equation 3})$$

that importantly captures the impact of changing salinity on not just  $p\text{CO}_2$  sensitivity (the last term in Equation 1) but also  $\text{TCO}_2$  and Alk. This was done using mean  $p\text{CO}_2$  and salinity (S) in each grid cell, defined as  $\overline{p\text{CO}_2}$  and  $\bar{S}$ , with the salinity ( $\gamma_S$ ),  $\text{TCO}_2$  ( $\gamma_{\text{TCO}_2}$ ), and TALK ( $\gamma_{\text{TALK}}$ ) buffer factors (Takahashi et al., 1993). We used global average values for these three buffer factors in this computation. The values were 1, 10, and -9.4 for  $\gamma_S$ ,  $\gamma_{\text{TCO}_2}$ , and  $\gamma_{\text{TALK}}$ , respectively (Takahashi et al., 1993). Note that  $\gamma_{\text{TCO}_2}$  and  $\gamma_{\text{TALK}}$  oppose each other, and differences from the global averages would be largely compensated for by the competing influence of increasing (or decreasing)  $\text{TCO}_2$  and increasing (or decreasing) Alk. Finally, the

thermodynamic components, pCO<sub>2</sub> T-component and pCO<sub>2</sub> S-component, can be combined and then differenced from the observations to isolate variability that results from the remaining biophysical drivers. The seasonal amplitude of each component of pCO<sub>2</sub> variability was assessed, and the ratio of the amplitude of thermodynamic (T, S, or TS) to biophysical drivers (B<sub>T</sub>, B<sub>S</sub>, B<sub>TS</sub>; where subscript denotes the removed terms) defined which was more important for determining pCO<sub>2</sub> variability on an annual basis (Takahashi et al., 2002; Fassbender et al., 2018).

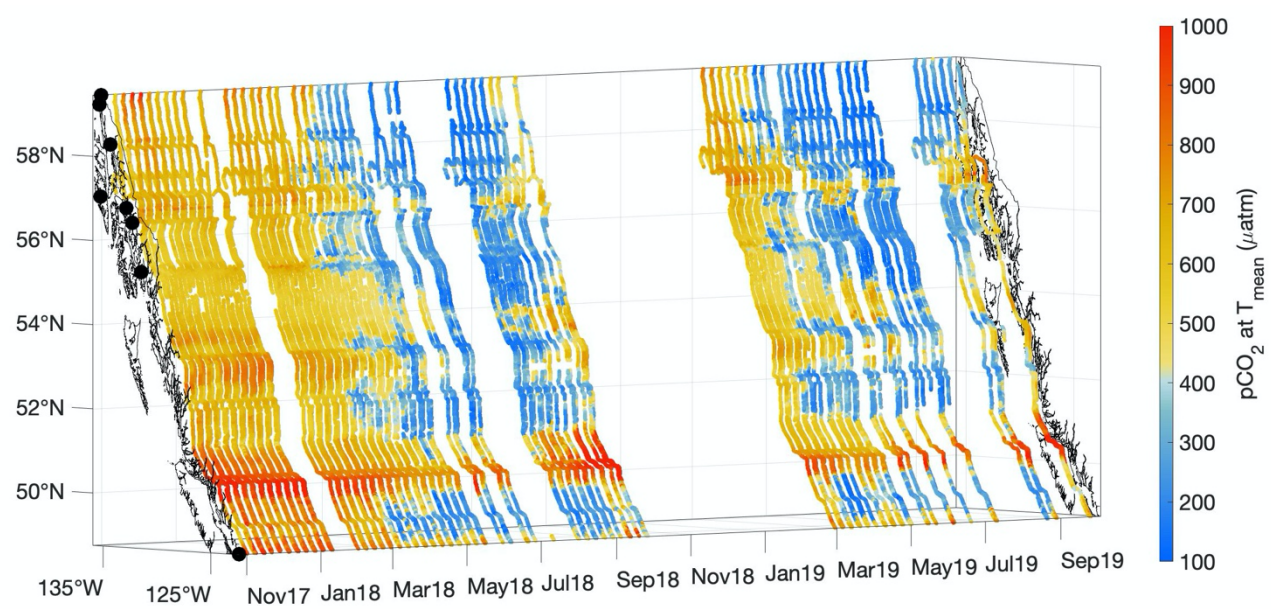

**Supplemental Figure S4:** The biophysical component of pCO<sub>2</sub> variability (μatm). X- and y-axes represent longitude and latitude, respectively, and with the coastline and terminal positions shown as in Figure 1 and time increasing along the z-axis.

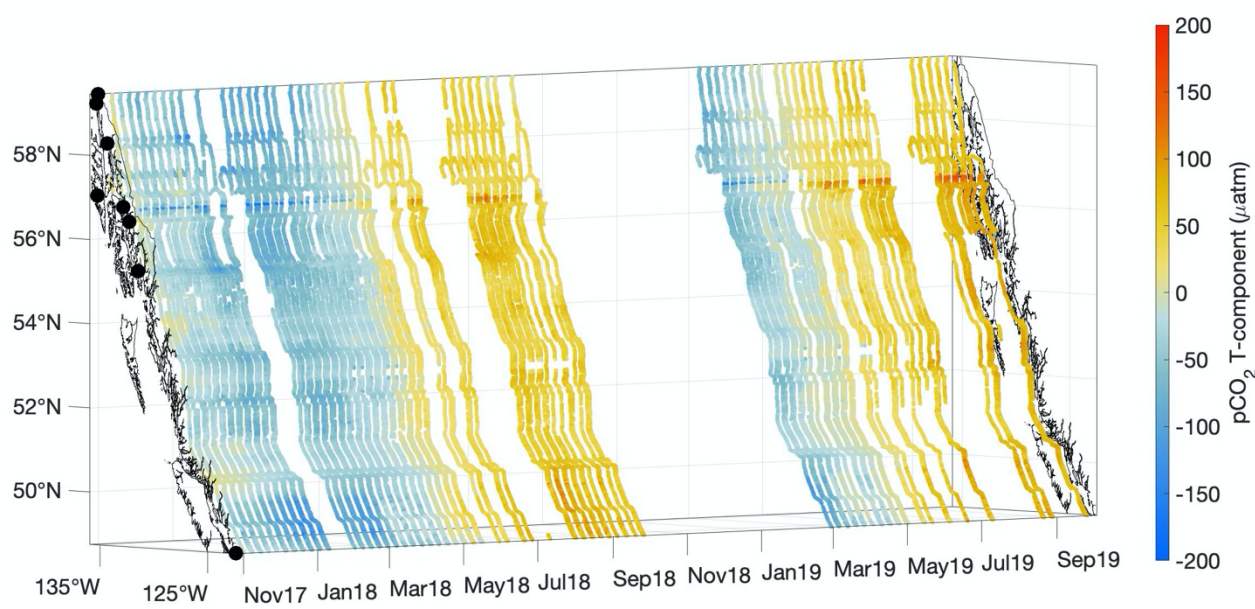

**Supplemental Figure S5:** The temperature component of pCO<sub>2</sub> variability (µatm). X- and y-axes represent longitude and latitude, respectively, and with the coastline and terminal positions shown as in Figure 1 and time increasing along the z-axis.

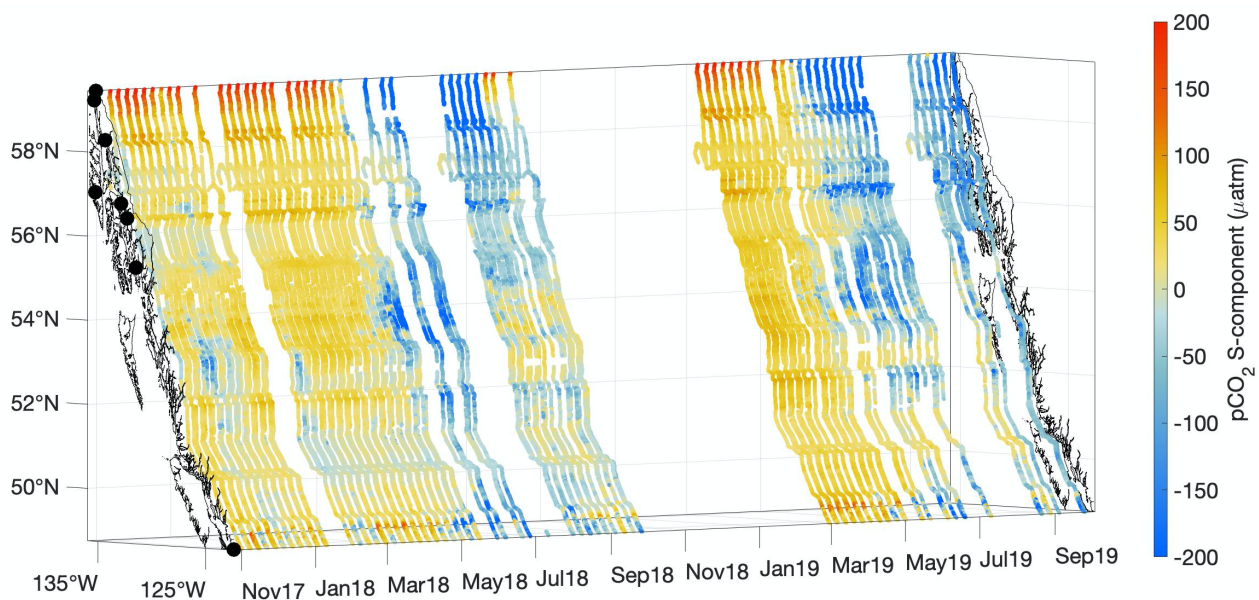

**Supplemental Figure S6:** The salinity component of  $p\text{CO}_2$  variability ( $\mu\text{atm}$ ). X- and y-axes represent longitude and latitude, respectively, and with the coastline and terminal positions shown as in Figure 1 and time increasing along the z-axis.

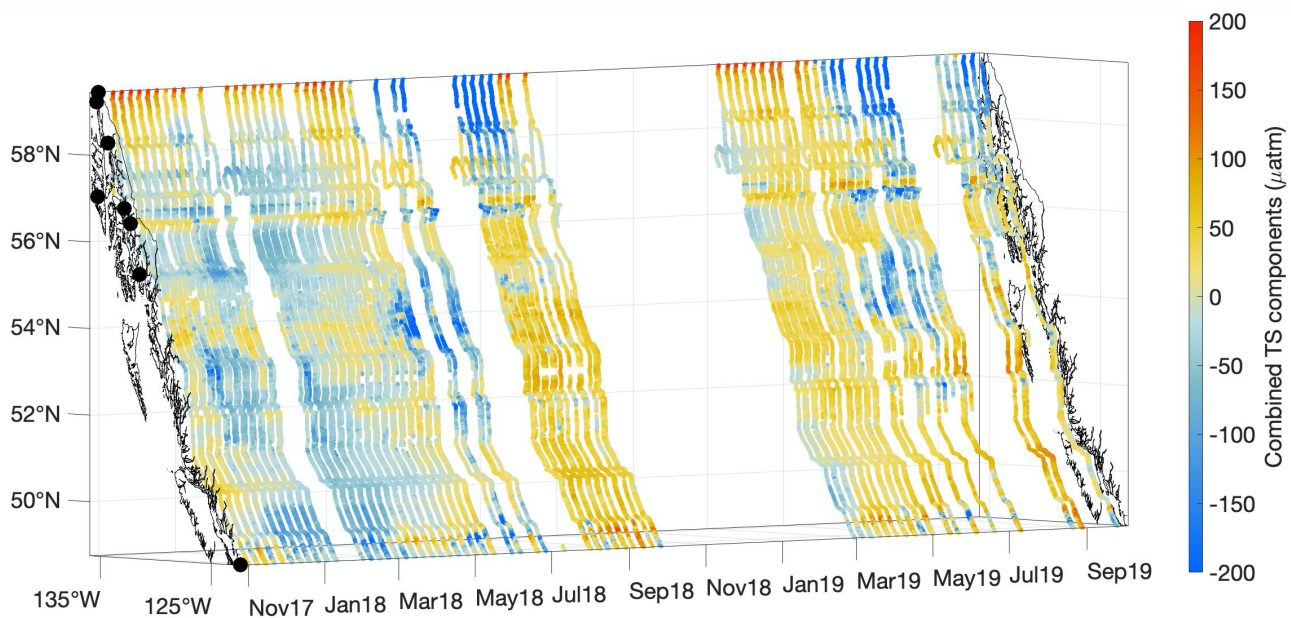

120 **Supplemental Figure S7:** The combined temperature and salinity components of pCO<sub>2</sub> variability (μatm). X- and y-axes represent longitude and latitude, respectively, and with the coastline and terminal positions shown as in Figure 1 and time increasing along the z-axis.

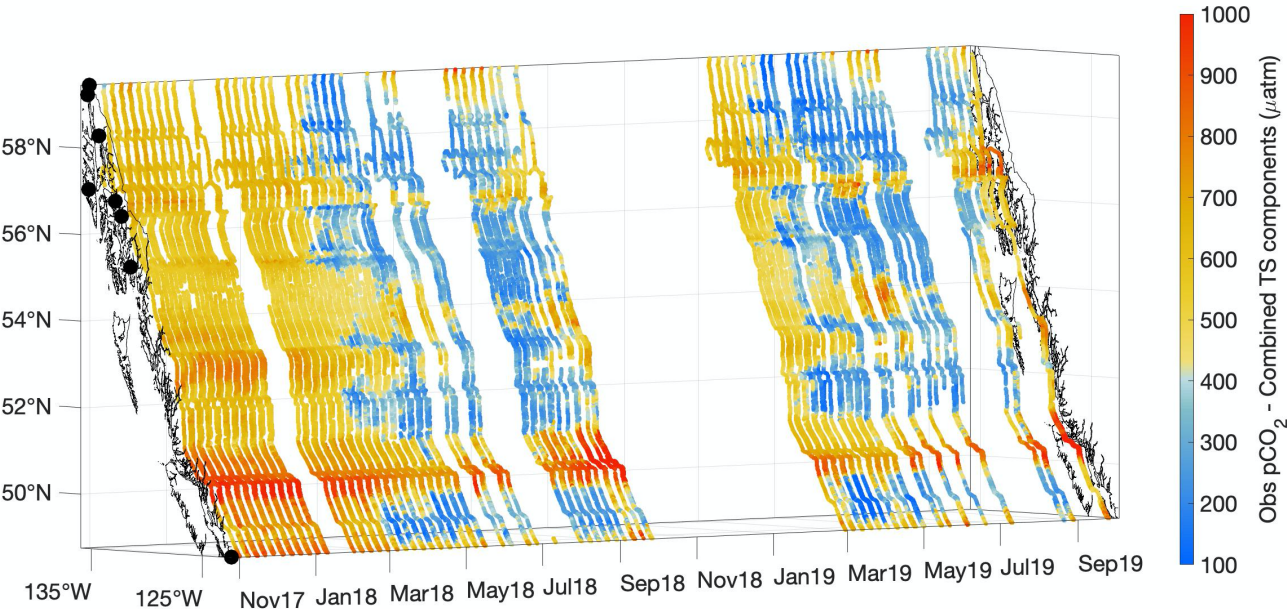

**Supplemental Figure S8:** Observed pCO<sub>2</sub> minus the combined temperature and salinity components of pCO<sub>2</sub> variability (μatm). Subtracting both the pCO<sub>2</sub> S-component and the pCO<sub>2</sub> T-component (TS) from the observed pCO<sub>2</sub> leaves remaining variability associated mainly with NCP because calcification is only episodically important in this region and gas exchange is slow (order months). X- and y-axes represent longitude and latitude, respectively, and with the coastline and terminal positions shown as in Figure 1 and time increasing along the z-axis.

130

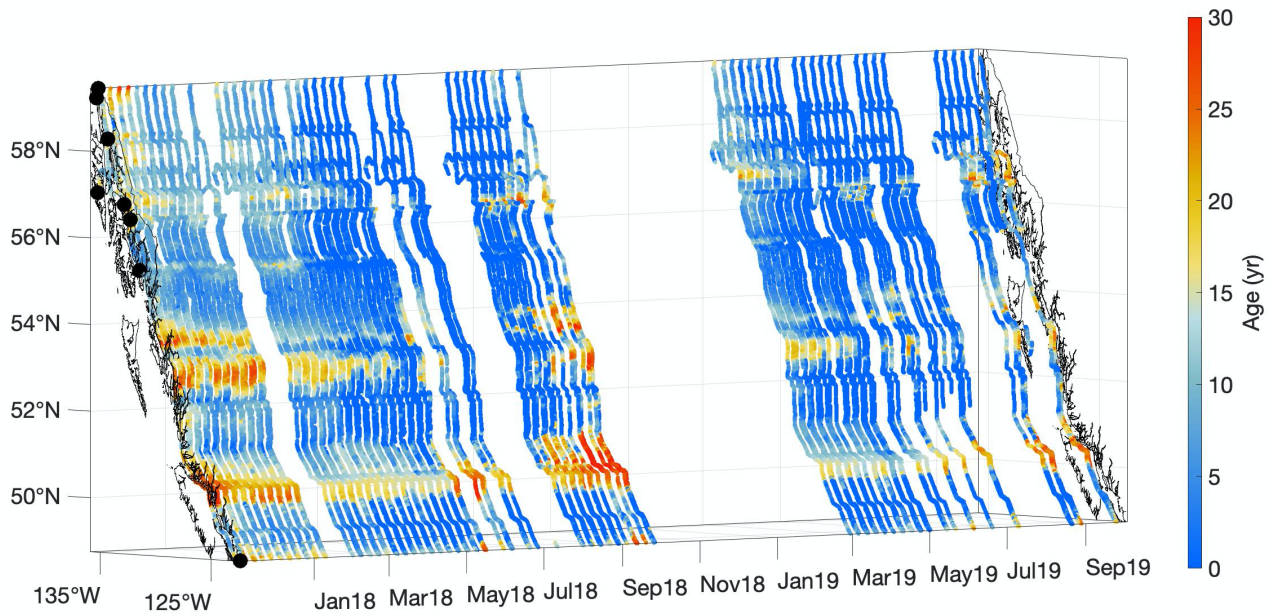

135 **Supplemental Figure S9:** The age (yr), or time since last contact with the atmosphere, of surface water along the Inside Passage. X- and y-axes represent longitude and latitude, respectively, and with the coastline and terminal positions shown as in Figure 1 and time increasing along the z-axis.

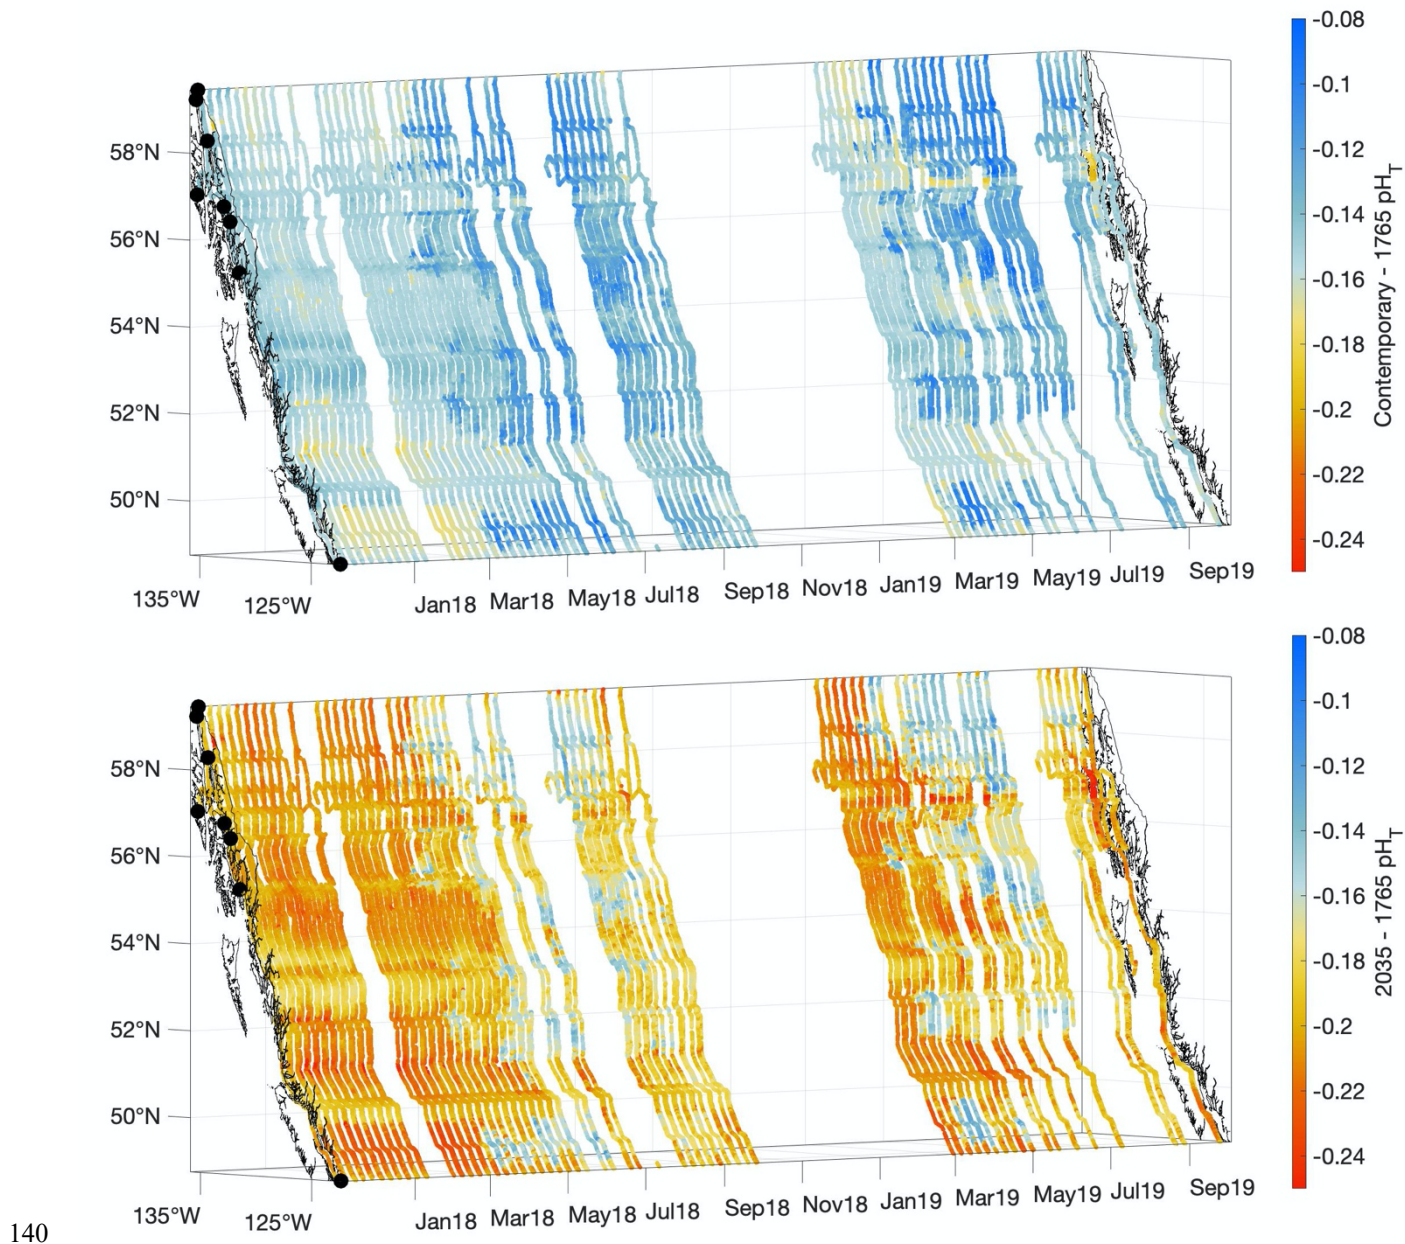

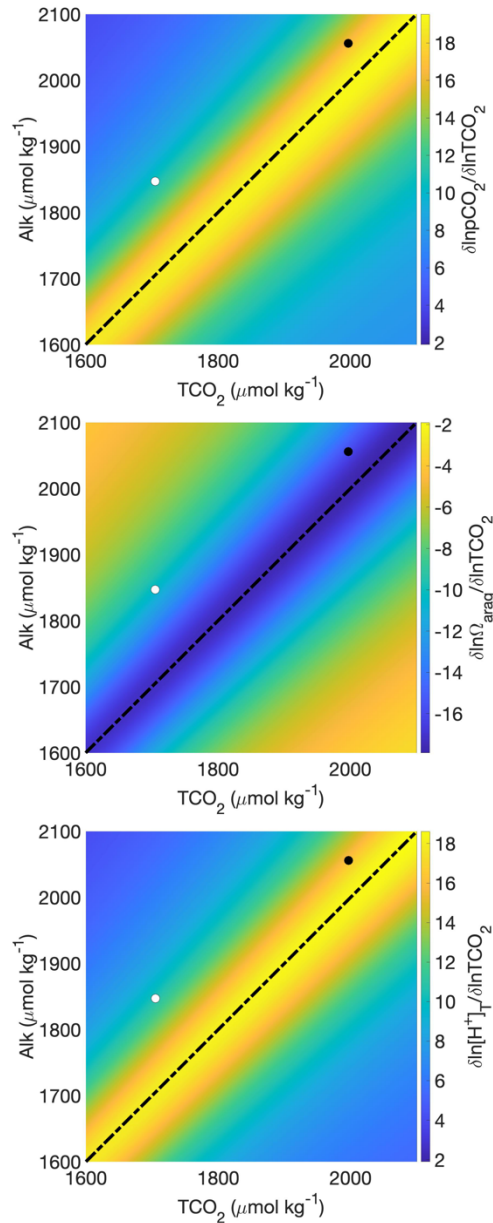

145 **Supplemental Figure S11:** Buffer factors for  $p\text{CO}_2$  (top, the Revelle factor),  $\Omega_{\text{arag}}$  (middle), and  $[\text{H}^+]_{\text{T}}$  (bottom) as a function  
 of  $\text{TCO}_2$  and  $\text{Alk}$ . The buffer factor is the percentage change in each variable following a percentage change in  $\text{TCO}_2$ . The  
 dashed line denotes equal  $\text{TCO}_2$  and  $\text{Alk}$  across the range of values shown, and is the minimum buffering state (and maximum  
 Revelle factor) for all buffer factors. Average  $\text{TCO}_2$  and  $\text{Alk}$  values for summer (white circle) and winter (black circle) are  
 shown to highlight that winter conditions on average are closer to the minimum buffering state, and therefore percentage  
 150 changes in these values will be greatest during winter.

## References

- Egleston, E. S., Sabine, C. L., and Morel, F. M. M.: Revelle revisited: Buffer factors that quantify the response of ocean chemistry to changes in DIC and alkalinity, *Global Biogeochemical Cycles*, 24, doi: 10.1029/2008GB003407, 2010.
- 155 Evans, W., Mathis, J. T., Ramsay, J., and Hetrick, J.: On the Frontline: Tracking Ocean Acidification in an Alaskan Shellfish Hatchery, *PLoS One*, 10, e0130384, 10.1371/journal.pone.0130384, 2015.
- Fassbender, A. J., Rodgers, K. B., Palevsky, H. I., and Sabine, C. L.: Seasonal Asymmetry in the Evolution of Surface Ocean pCO<sub>2</sub> and pH Thermodynamic Drivers and the Influence of Sea-Air CO<sub>2</sub> Flux, *Global Biogeochemical Cycles*, 32, 1476-1497, 2018.
- 160 Middelburg, J. J., Soetaert, K., and Hagens, M.: Ocean Alkalinity, Buffering and Biogeochemical Processes, *Reviews of Geophysics*, doi.org/10.1029/2019RG000681, 2020.
- Sarmiento, J. L., and Gruber, N.: *Ocean Biogeochemical Dynamics*, Princeton University Press, Princeton, 2006.
- Sundquist, E. T., Plummer, L. N., and Wigley, T. M. L.: Carbon Dioxide in the Ocean Surface: The Homogeneous Buffer Factor, *Science*, 204, 1203-1205, 1979.
- 165 Takahashi, T., Olafsson, J., Goddard, J. G., Chipman, D. W., and Sutherland, S. C.: Seasonal Variation of CO<sub>2</sub> and Nutrients in the High-Latitude Surface Oceans: a Comparative Study, *Global Biogeochemical Cycles*, 7, 843-878; doi:10.1029/1093GB02263, 1993.
- 170 Takahashi, T., Sutherland, S. C., Sweeney, C., Poisson, A., Metzl, N., Tilbrook, B., Bates, N. R., Wanninkhof, R., Feely, R. A., Sabine, C. L., Olafsson, J., and Nojiri, Y.: Global sea-air CO<sub>2</sub> flux based on climatological surface ocean pCO<sub>2</sub>, and seasonal biological and temperature effects, *Deep-Sea Research II*, 49, 1601-1622, 2002.
